# Supplementary material for: An IMPLICATION-logic-based fluorescent probe for sequential detection of Cu2+ and phosphates in living cells
Source: Royal Society of Chemistry journal article supplement (doi:10.1039/d1nj04992e), 2021-12-23
Supplement: d1nj04992e1.pdf [file d1nj04992e1.pdf]

## An IMPLICATION-logic based fluorescent probe for sequential detection of $\text{Cu}^{2+}$ and phosphates in living cells

Meixiang Wang, Xiaoxiao Niu, Rui Cao, Mengyu Zhang, Huajie Xu\*, Fuying Hao and Zhaodi Liu\*

School of Chemistry and Materials Engineering, Fuyang Normal University, Fuyang, Anhui  
236037, P. R. China. E-mail: [zhaodi\\_liu@163.com](mailto:zhaodi_liu@163.com), [2000xhj@163.com](mailto:2000xhj@163.com)

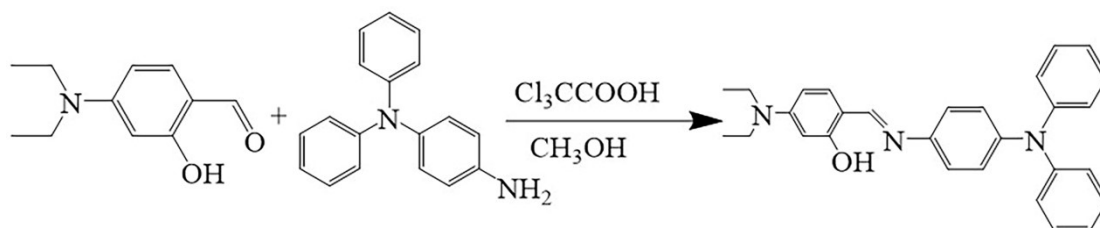

Scheme S1 The synthesis of HL

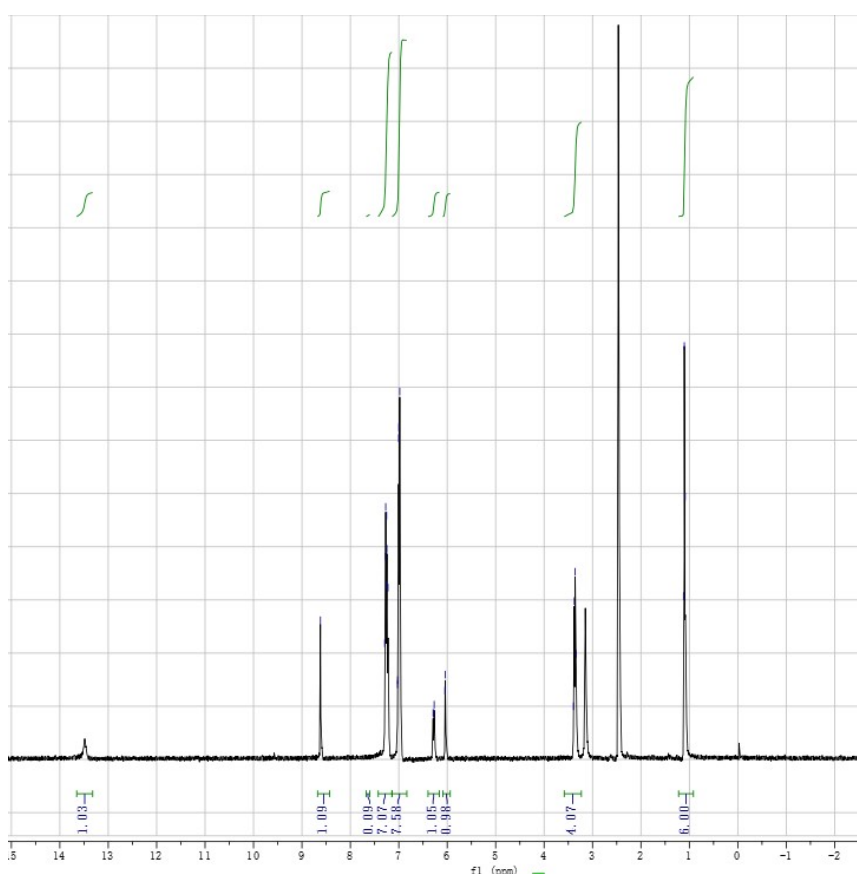

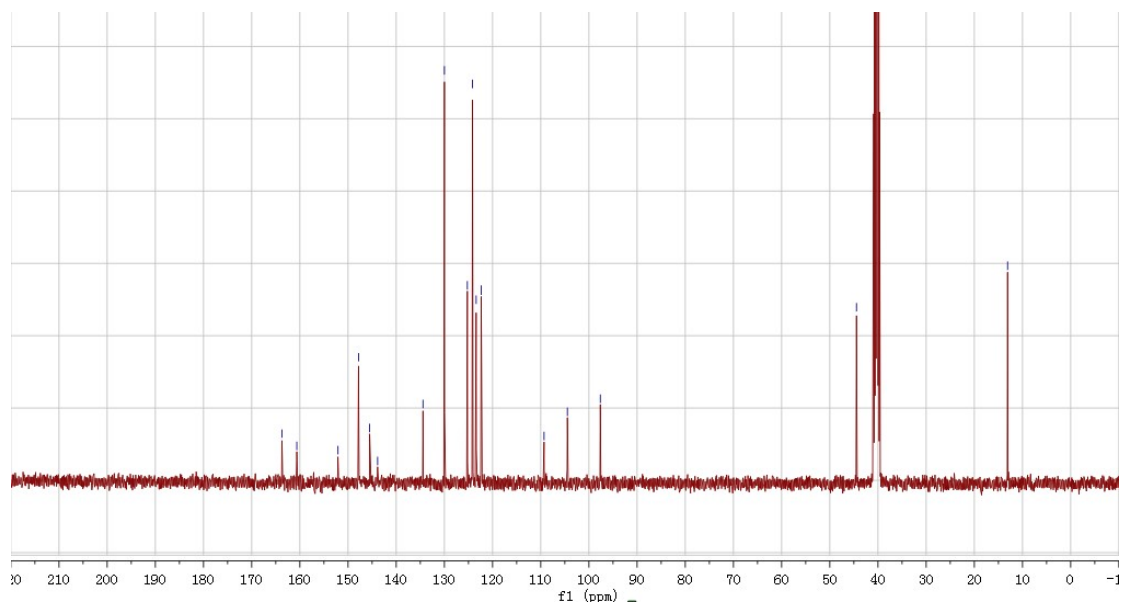

Fig.S1.  $^1\text{H}$  NMR (upper) spectra and  $^{13}\text{C}$  NMR (bottom) spectra of HL in  $d_6$ -acetone.

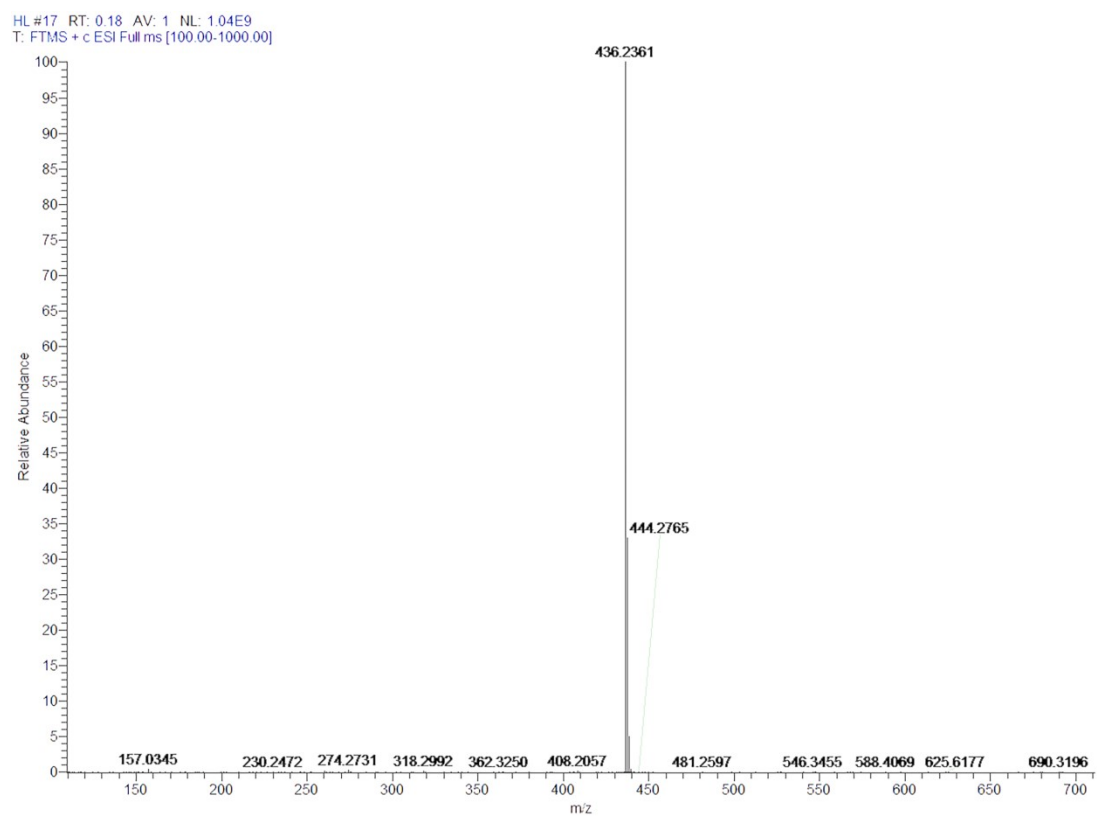

Fig.S2.ESI-MS spectrum of HL.

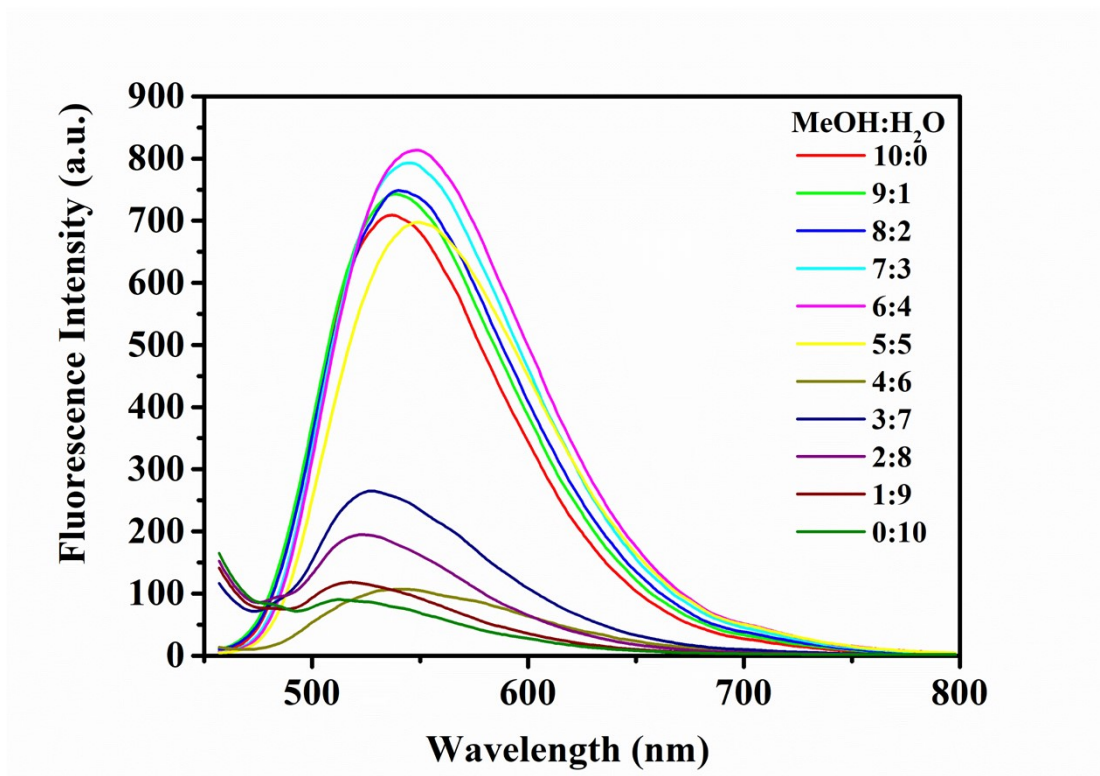

Fig.S3. HL fluorescence diagram at different moisture contents

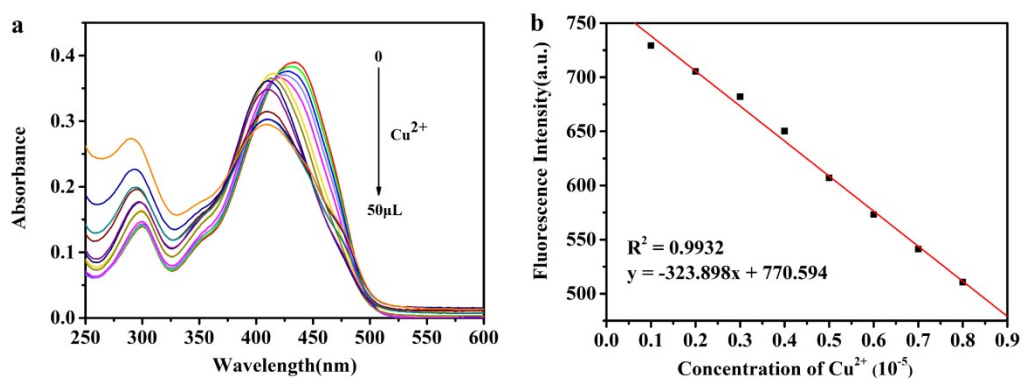

Fig.S4. (a) The absorbance titration of probe HL (10  $\mu$ M) with  $\text{Cu}^{2+}$  (16.7  $\mu$ M); (b) Fluorescence spectroscopy HL on  $\text{Cu}^{2+}$  titration working curve (in methanol/HEPES ( $V_{\text{methanol}}/V_{\text{HEPES}} = 7/3$ )) ( $\lambda_{\text{ex}} = 450 \text{ nm}$ )

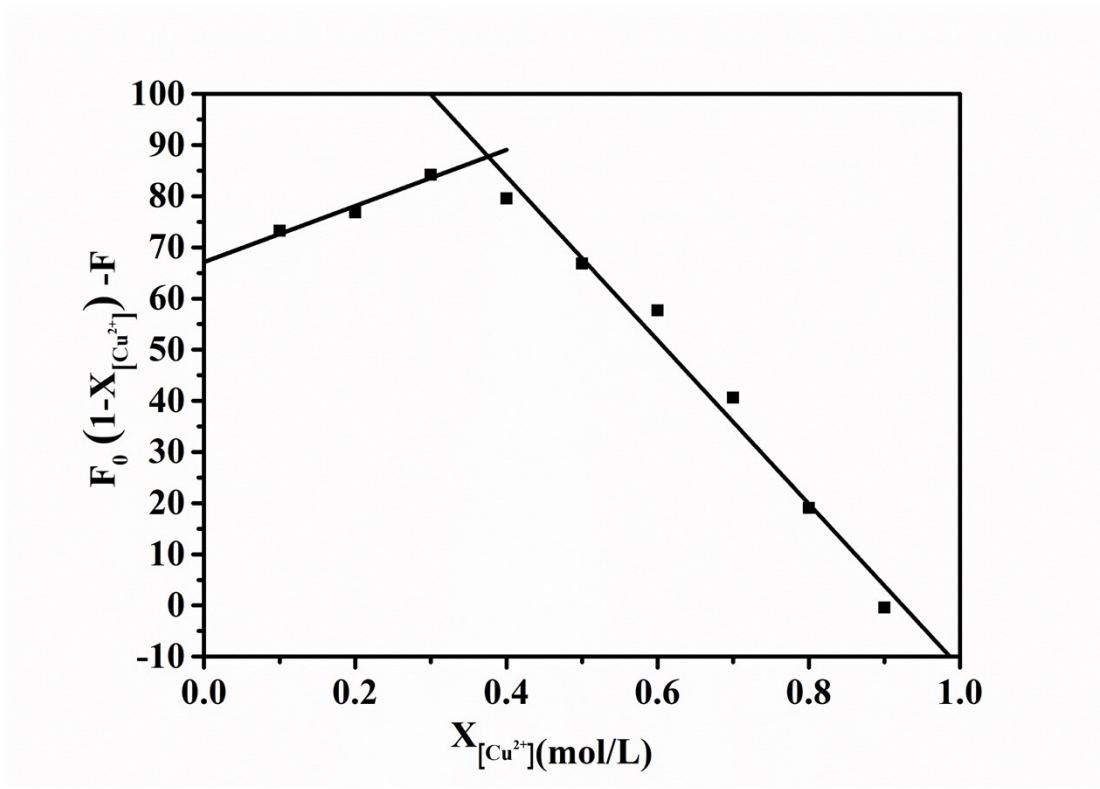

Fig.S5. Job plot determining the binding mode of L-Cu in methanol/HEPES ( $V_{\text{methanol}}/V_{\text{HEPES}} = 7/3$ )

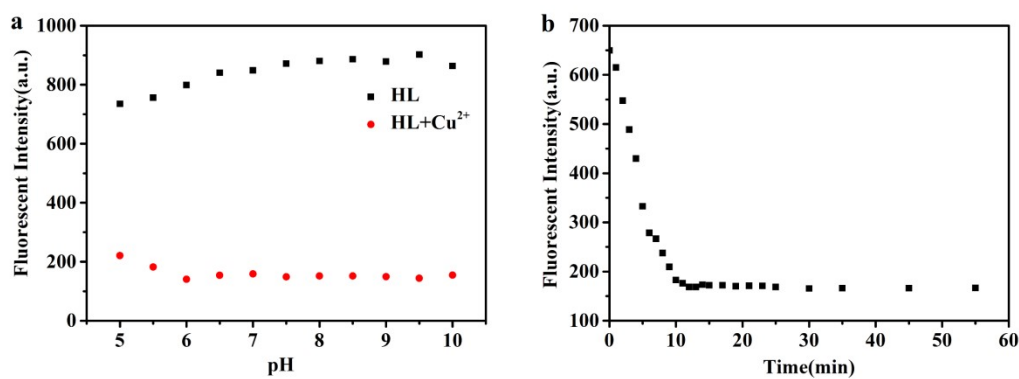

Fig.S6. (a) The effect of pH on probe **HL** with or without  $\text{Cu}^{2+}$ ; (b) The time-dependent on probe **HL** with  $\text{Cu}^{2+}$  ( $\lambda_{\text{em}} = 550 \text{ nm}$ ).

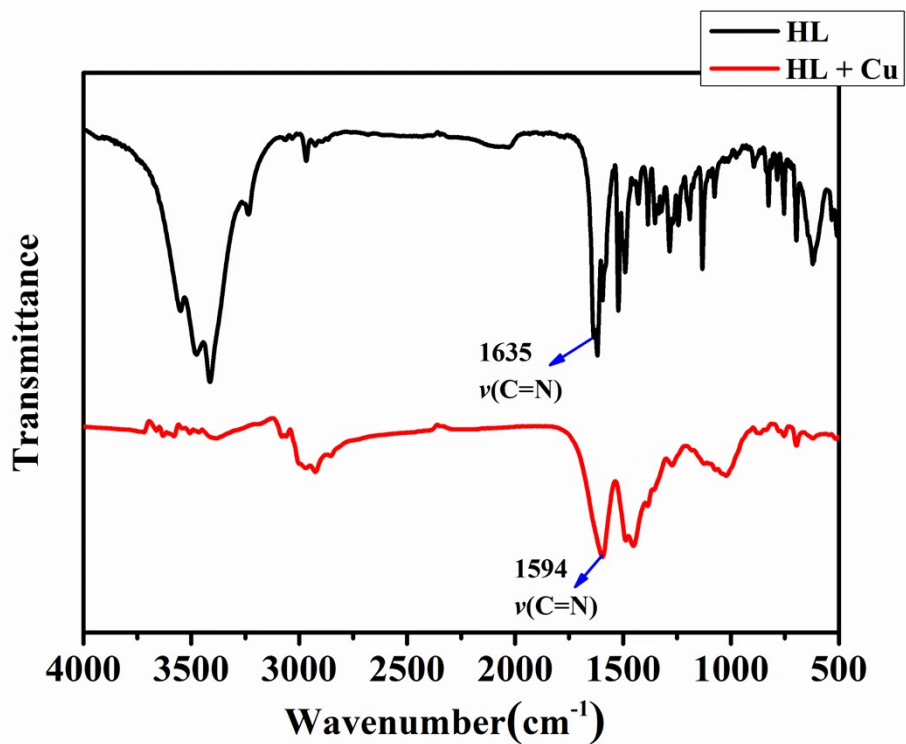

Fig.S7. The IR spectra of HL (black) and L-Cu<sup>2+</sup> complex(red)

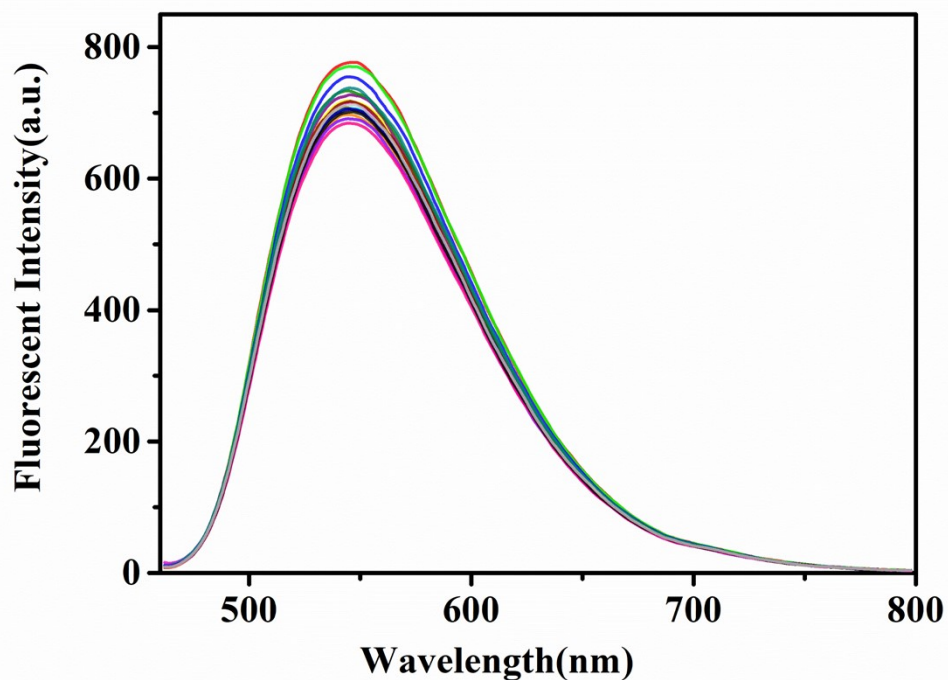

Fig.S8. The fluorescence spectrogram of HL with anions (F<sup>-</sup>, Cl<sup>-</sup>, Br<sup>-</sup>, I<sup>-</sup>, Ac<sup>-</sup>, NO<sub>3</sub><sup>-</sup>, ClO<sup>-</sup>, HCO<sub>3</sub><sup>-</sup>, HSO<sub>3</sub><sup>-</sup>, CO<sub>3</sub><sup>2-</sup>, SO<sub>3</sub><sup>2-</sup>, SiO<sub>3</sub><sup>2-</sup>, SO<sub>4</sub><sup>2-</sup>, H<sub>2</sub>PO<sub>4</sub><sup>-</sup>, HPO<sub>4</sub><sup>2-</sup>, PO<sub>4</sub><sup>3-</sup>, PPI<sup>4-</sup>) (10

$\mu\text{M}$ ) ( $\lambda_{\text{ex}} = 450 \text{ nm}$ )

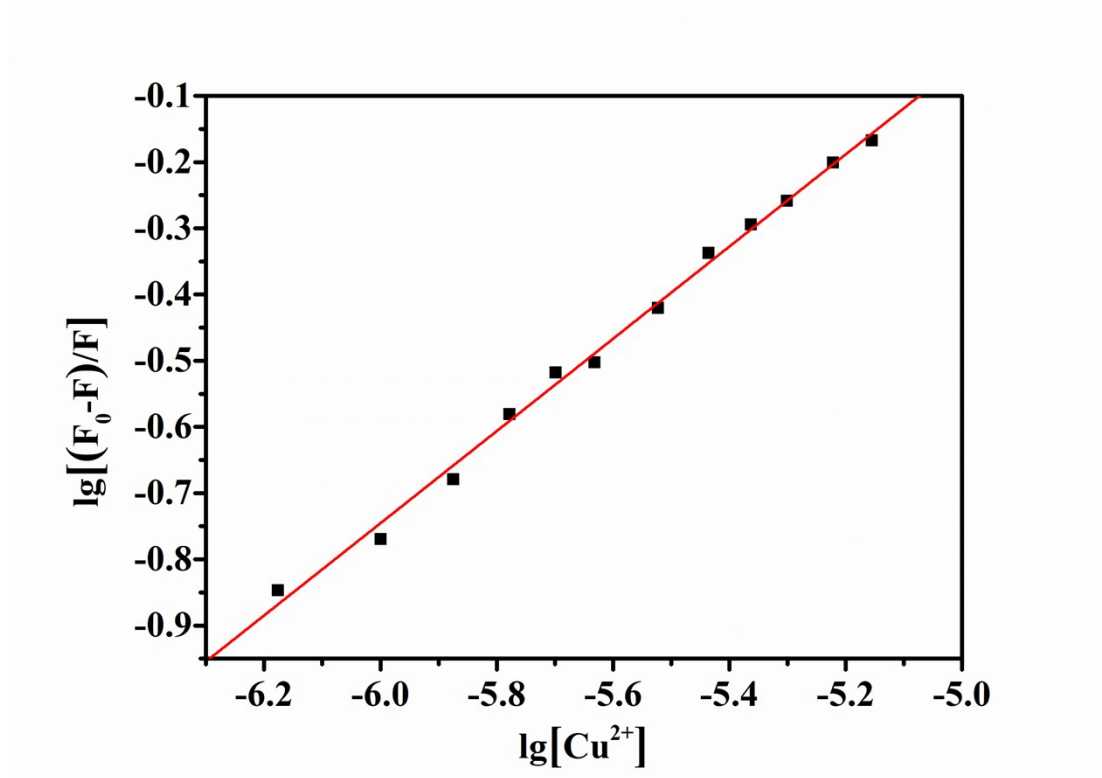

Fig.S9. Fitting of fluorescence titration of HL with  $\text{Cu}^{2+}$  in methanol/HEPES ( $\text{pH} = 7.00, 7/3, \text{v/v}$ ). ( $\lambda_{\text{ex}} = 450 \text{ nm}$ ). The binding constant of HL and  $\text{Cu}^{2+}$  is  $7.9 \times 10^{-4} \text{ M}^{-2}$ .

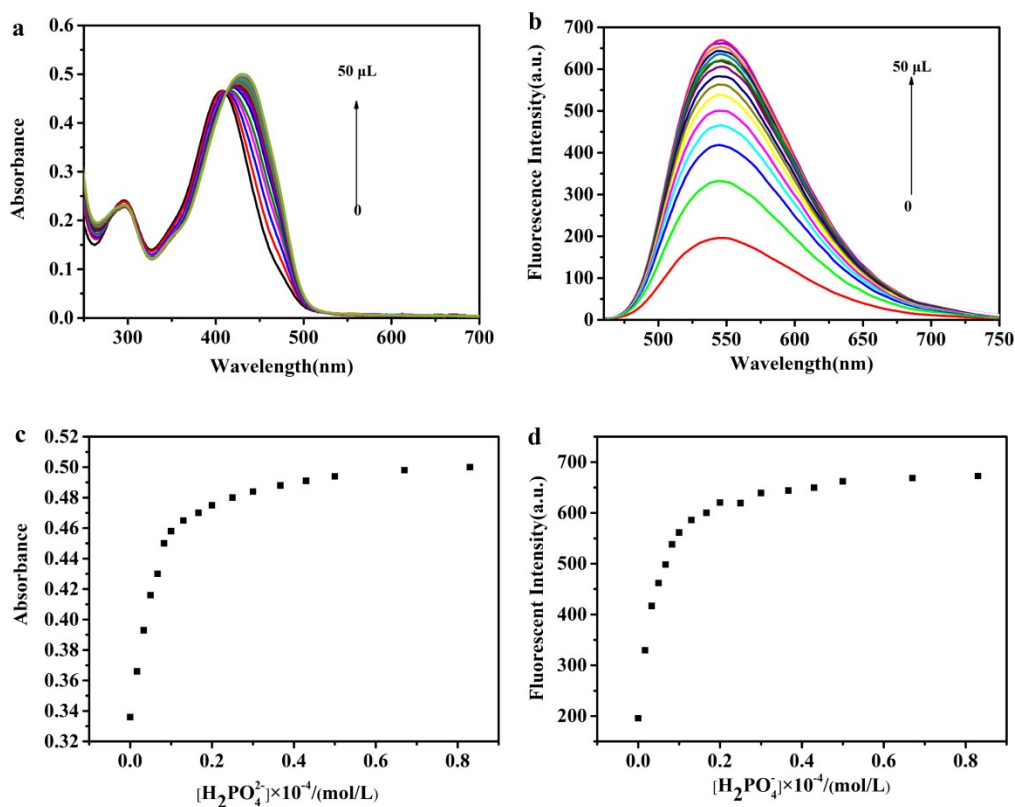

Fig.S10. The absorbance titration (a) and the fluorescence titration (b) of probe L-Cu (10  $\mu\text{M}$ ) with  $\text{H}_2\text{PO}_4^-$  (16.7  $\mu\text{M}$ ) ( $\lambda_{\text{ex}} = 450 \text{ nm}$ );(c) changes in absorbance at 450 nm against concentration of  $\text{H}_2\text{PO}_4^-$  (in methanol/HEPES ( $V_{\text{methanol}}/V_{\text{HEPES}} = 7/3$ )) (d) changes in fluorescence intensity at 450 nm against concentration of  $\text{H}_2\text{PO}_4^-$  (in methanol/HEPES ( $V_{\text{methanol}}/V_{\text{HEPES}} = 7/3$ )).

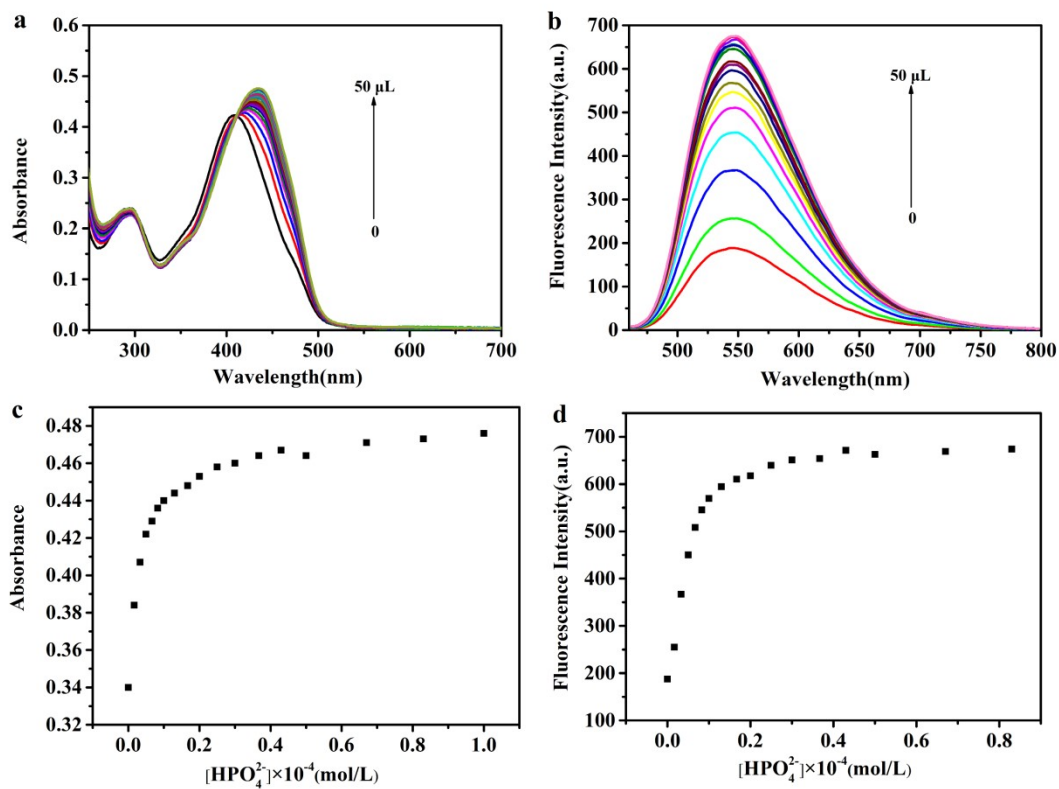

Fig.S11. The absorbance titration (a) and the fluorescence titration (b) of probe L-Cu (10  $\mu\text{M}$ ) with  $\text{HPO}_4^{2-}$  (16.7  $\mu\text{M}$ ) ( $\lambda_{\text{ex}} = 450 \text{ nm}$ ); (c) changes in absorbance at 450 nm against concentration of  $\text{HPO}_4^{2-}$  (in methanol/HEPES ( $V_{\text{methanol}}/V_{\text{HEPES}} = 7/3$ )) (d) changes in fluorescence intensity at 450 nm against concentration of  $\text{HPO}_4^{2-}$  (in methanol/HEPES ( $V_{\text{methanol}}/V_{\text{HEPES}} = 7/3$ )).



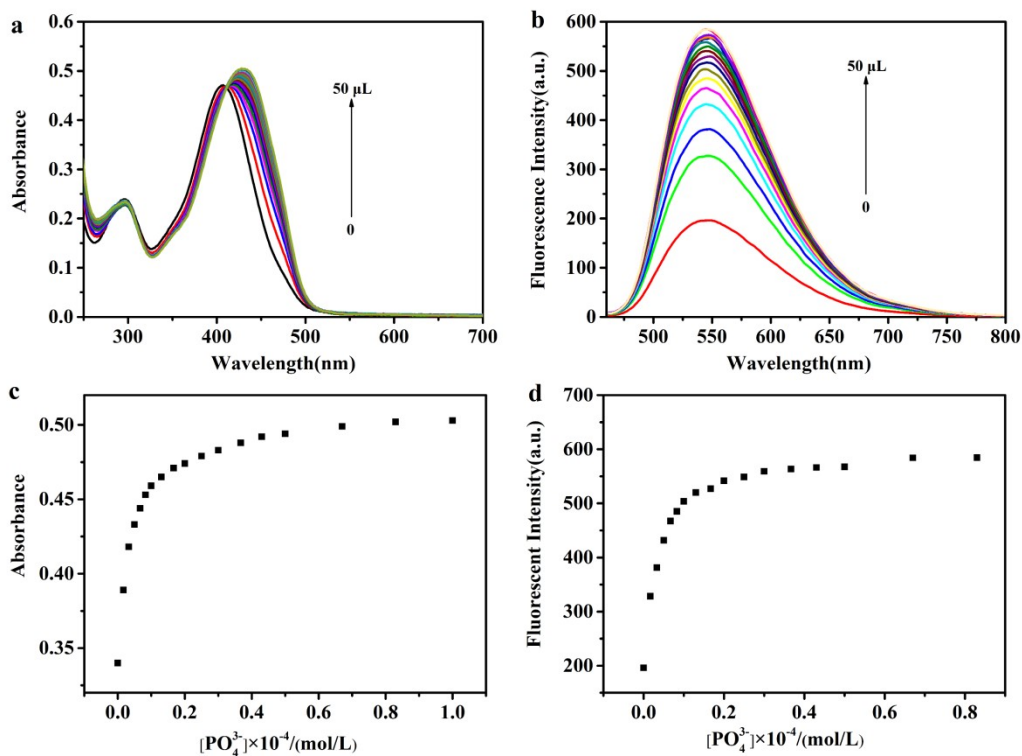

Fig.S12. The absorbance titration (a) and the fluorescence titration (b) of probe L-Cu (10  $\mu\text{M}$ ) with  $\text{PO}_4^{3-}$  (16.7  $\mu\text{M}$ ) ( $\lambda_{\text{ex}} = 450 \text{ nm}$ );(c) changes in absorbance at 450 nm against concentration of  $\text{PO}_4^{3-}$  (in methanol/HEPES ( $V_{\text{methanol}}/V_{\text{HEPES}} = 7/3$ )) (d) changes in fluorescence intensity at 450 nm against concentration of  $\text{PO}_4^{3-}$  (in methanol/HEPES ( $V_{\text{methanol}}/V_{\text{HEPES}} = 7/3$ )).

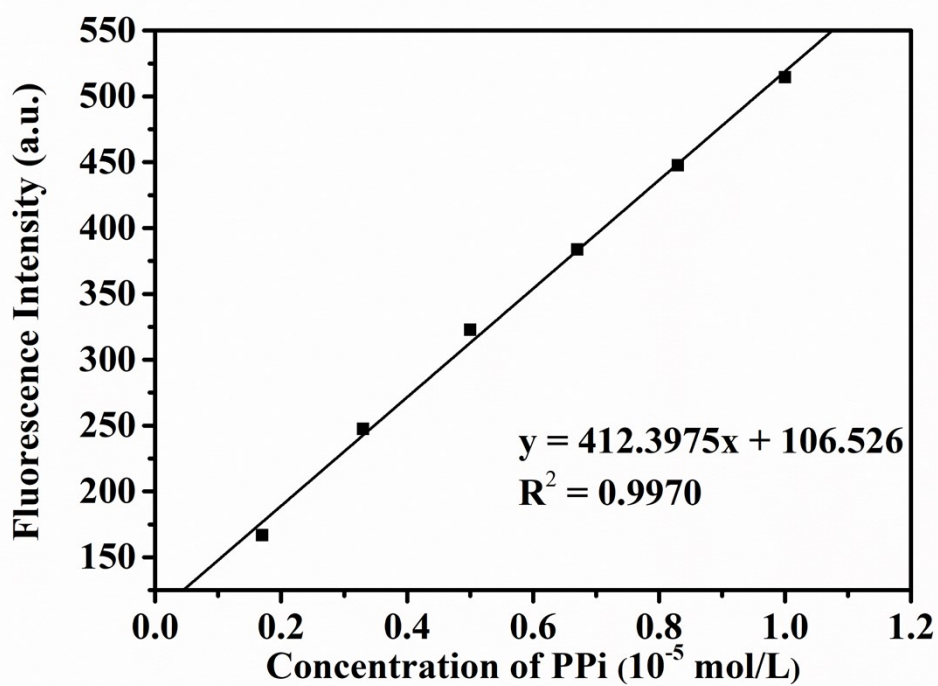

Fig.S13. The curve of Fluorescence Intensity with PPI concentration (0 – 16.7  $\mu$ M).

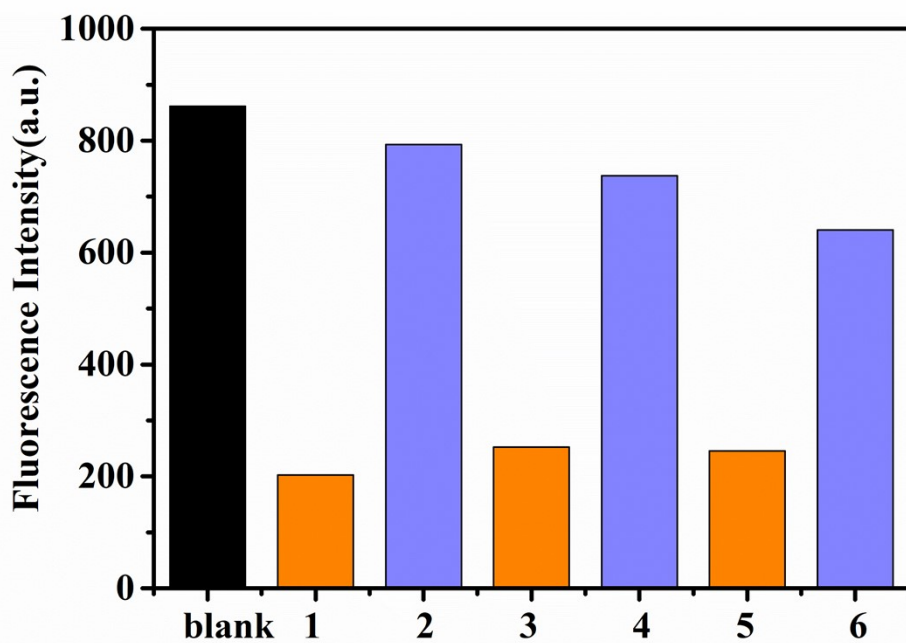

Fig.S14. Fluorescence peak intensity plots of HL with alternate addition of  $\text{Cu}^{2+}$  and PPI (1, 3 and 5 indicate addition of 30, 60 and 90  $\mu\text{LCu}^{2+}$ , respectively; 2, 4 and 6

indicate addition of 30, 60 and 90  $\mu\text{LPPi}^{4-}$ , respectively .)

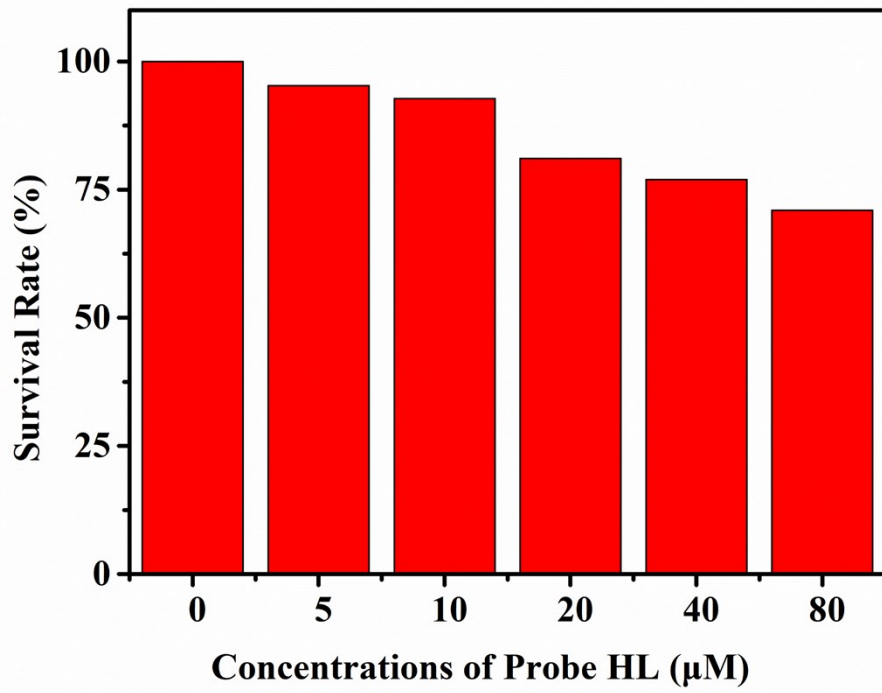

Fig.S15. Cytotoxicity experiments of HeLa cells at various concentrations.
